# Supplementary material for: Morphological, Molecular, and Biochemical Characterization of a Unique Lentil (Lens culinaris Medik.) Genotype Showing Seed-Coat Color Anomalies Due to Altered Anthocyanin Pathway
Source: MDPI journal article supplement (doi:10.3390/plants11141815), 2022-07-10
Supplement: s1 [file s1]

**Table S1. List of primers used in the study (Jain *et al.* 2013)**

| S. No. | Primer | Sequence (5'-3')                                                       |
|--------|--------|------------------------------------------------------------------------|
| 1.     | PLC 1  | F: TCA TTC CTT CAT CTT CCA CGT A<br>R: TTT GAC TTT CCA ACA ACC TCC T   |
| 2.     | PLC 2  | F: TTG ACT GTT CTG GCG TTT TCT A<br>R: TGC ACC ATC TTT TGC CTA CAT A   |
| 3.     | PLC 3  | F: AGA TCG TTT GCT CAT CTG GAA T<br>R: TCC TTT TCC TTC ATT AAC GGT G   |
| 4.     | PLC 4  | F: CCTATCGGGAAACTACATGGAA<br>R: TCT GCA TTG GTC TTC TTC TCA A          |
| 5.     | PLC 7  | F: GCT TTT ATG ATC TTC TCG TGG T<br>R: CGA GGA TTA CTT TTC AAT GGT C   |
| 6.     | PLC 8  | F: CTC CTT CCA TTT CTC TTT CTG C<br>R: TCC TGA ACG ACA CCA ACA CTA C   |
| 7.     | PLC 10 | F: TGC AAC AAA GGA CAC TAG AGG TT<br>R: ATT TCT TTC TCC CTA ACC AGC C  |
| 8.     | PLC 12 | F: GGA AGC AAG ATG GAA GAA GTT G<br>R: GCG CCA TTA GTG CAG AGT AAA T   |
| 9.     | PLC 14 | F: TCT GGA AGA GGG TTT GTA CCA T<br>R: GCA GTT AGA TCA CAG CTA CCA AAA |
| 10.    | PLC 16 | F: CGT TTG ATC TTC TAA GCC CCT A<br>R: AAG GGA AAG GAT GTT TGA CTT G   |
| 11.    | PLC 18 | F: GGA CCA TCA ACT AGC ACA TGA C<br>R: TCA CAT CAT CAA CAT GCT CAA C   |
| 12.    | PLC 20 | F: GGT CTT TTA TGG GAA GTG CTT G<br>R: TTA ACA AAC AGG CTA GGC CAA T   |
| 13.    | PLC 22 | F: TAC ACT GAA GGA GAT GCA CTG G<br>R: TAA CAA CAA AAC ACA GCT TCG C   |
| 14.    | PLC 24 | F: CAT GTT AAT GAC GGG TAG CTG A<br>R: TGA TTT TGC CTT GTG TGG TAT C   |
| 15.    | PLC 27 | F: AAA TAG TGT TGC TGG ATT GGC T<br>R: ACC TTT CCT ATC TTG TTT CCC A   |
| 16.    | PLC 29 | F: TAC TTT CCA CAA AAC TCG CAG A<br>R: CAA CAA CAT GCA AAC AAC ACA G   |
| 17.    | PLC 30 | F: TTG GTC AGG TTC TCA ATC CTC T<br>R: ACG GAT GAA CGC TTG TAA AGA A   |
| 18.    | PLC 31 | F: CAT TGC AGC TTA TTC TCA CAG C<br>R: TGA CCC ATC CTC ATC CTT AAA T   |
| 19.    | PLC 33 | F: CTA AAG ATG AGC ATT TGG ACC C<br>R: TGT TCA CCA CCA AGA ATG GTA A   |
| 20.    | PLC 34 | F: TAC TGG ATG AGA CGA AGA TGG A<br>R: CGA AAC CTG GCC TAT ACA AAA G   |
| 21.    | PLC 35 | F: TTG CTT CCT CCT CTT CTC ACT C<br>R: AGC CTC AGT ACC CTC CTC TTT T   |
| 22.    | PLC 36 | F: ACT CAA GTC AAC CTC AGA AGG C<br>R: CTT AGG AGC CGG AGA AGAAGA T    |
| 23.    | PLC 37 | F: CTC TCC AGT CCT TGC TTG ATG<br>R: ACC AAC AAA CTT GCC AGA CTT C     |
| 24.    | PLC 38 | F: CCT GGA GAA GTC TGT GGA AGA T<br>R: AGC TCT AGC ATT TTG CAT GTG A   |
| 25.    | PLC 39 | F: CAG AGA AAT CCC CTG CTG AG<br>R: CAT GAT TCC CAT AGC CTT GC         |
| 26.    | PLC 40 | F: CAA CTC GCA TCC TCT TCA CA<br>R: CAA AGG GGT TGG AGT CGT AA         |
| 27.    | PLC 43 | F: CGT GTG GTC CTA TCC TCT TG<br>R: ACG ATC AAA AGA AAA CCC GC         |
| 28.    | PLC 45 | F: CCT TAG TCA CTG TGG TCG ATG A                                       |

|     |        |                                                                         |
|-----|--------|-------------------------------------------------------------------------|
|     |        | R: ACA ATG AGA GGC CAG TGC TT                                           |
| 29. | PLC 46 | F: CAA ACT GGA AGA TGC TGC TG<br>R: TGA CCC ATC CTC ATC CTT AAA         |
| 30. | PLC 48 | F: TGT GGT ACA TGC ACA CCA AAT<br>R: GGT GGT AGC AGT GGT GGA GT         |
| 31. | PLC 49 | F: TTG TTT TGA GAA CCT TCC CC<br>R: TTT TGC AAG GGT ATT TCT TTT TG      |
| 32. | PLC 50 | F: CGA TTG GTC TTA TAT GGT TCT G<br>R: AAG CTA CCT GCA TAC TTG GTC      |
| 33. | PLC 51 | F: CCA TGA TGA GCC TTG AAT GA<br>R: TCT TCA ATC TCC AGG AAC ACT TT      |
| 34. | PLC 53 | F: TCG TGA TAA AAA CGG GGA AG<br>R: TAT CTT TGC CAC TGC CTC CT          |
| 35. | PLC 54 | F: GTA AAC GAA GCT CAG AGC CG<br>R: CAT ATC CAC GAT CCC TGC TT          |
| 36. | PLC 55 | F: AGA CAC CGG CAT CAA ATC AT<br>R: CAT ATT CAA ATA TTC AGT GTC ATG TTC |
| 37. | PLC 56 | F: GCC ATT TGT TGTTGT GTT TCA<br>R: TGC CAA GGT TTG CCT AGA AG          |
| 38. | PLC 57 | F: GGA AGT GAT TGT GGT TTT TAA TCA<br>R: ATT GCT CAT TCC CAC CAA AG     |
| 39. | PLC 58 | F: TGG AAG AAA GAG AAG GGC AA<br>R: CAC AGC TAC CAA AAA TCA GTT CC      |
| 40. | PLC 59 | F: TTG TTT AGC TGG TGT GGT TTT C<br>R: CTA CAG CAC GTT TGC AAG GA       |
| 41. | PLC 60 | F: TGC TTG GAC CCT AAA TTT GC<br>R: AAG AAA AGG GCA ACC ACT GA          |
| 42. | PLC 61 | F: ACT AGG AAA GGA AAA CGG CG<br>R: GAG TGA CAC GTG AAT GGT GG          |
| 43. | PLC 62 | F: GCA AAG AAC AAG AAT AAC GTG G<br>R: CAA ACC GAA GAA TAA GAG AGG G    |
| 44. | PLC 63 | F: TTG ATG GCT ATG GGA GTG GT<br>R: TGG TCC CAA CAA AAT ACC AA          |
| 45. | PLC 64 | F: CAA ACT CTT CAC CGA CAC GC<br>R: AAC GAG GGT TAG GAT GAG AAG C       |
| 46. | PLC 65 | F: TGT TGC AAT GCT TTT AGC CT<br>R: CAG AAG CTT TTC GGT GTT CC          |
| 47. | PLC 66 | F: ATT TGG AGC AAA GAT GCA GG<br>R: GGA TCG ACC TCC AAT CAA GA          |
| 48. | PLC 67 | F: GCA TAA TCA GTT TGT TTT TGC G<br>R: TTC TGC AAA AGC TTC TGG GT       |
| 49. | PLC 68 | F: AAA AAG AGG CCA TCA TGT TCA<br>R: CAG CAG TGA CGG CAA TTT TA         |
| 50. | PLC 69 | F: CGC TCT ACC AAC AGC ATA A<br>R: GAG GTC TCT TTT GTT CTT CAC T        |
| 51. | PLC 70 | F: CAT CTC TTC GTG GCG TAA T<br>R: AGC AAA CAA CAG CAC ACA TA           |
| 52. | PLC 71 | F: AGT GAG CAA GGA ATA AAA CG<br>R: GAG TAG CAA GGA AAG TGA AAA C       |
| 53. | PLC 72 | F: TAT GAT GAA AGC CAG GAC A<br>R: GAC TGC ACA ATC TTA AAC ACC          |
| 54. | PLC 73 | F: GAA AGG AAA GGT TTT AGC TG<br>R: CTT TGA TTG AGG TAA GAG CA          |

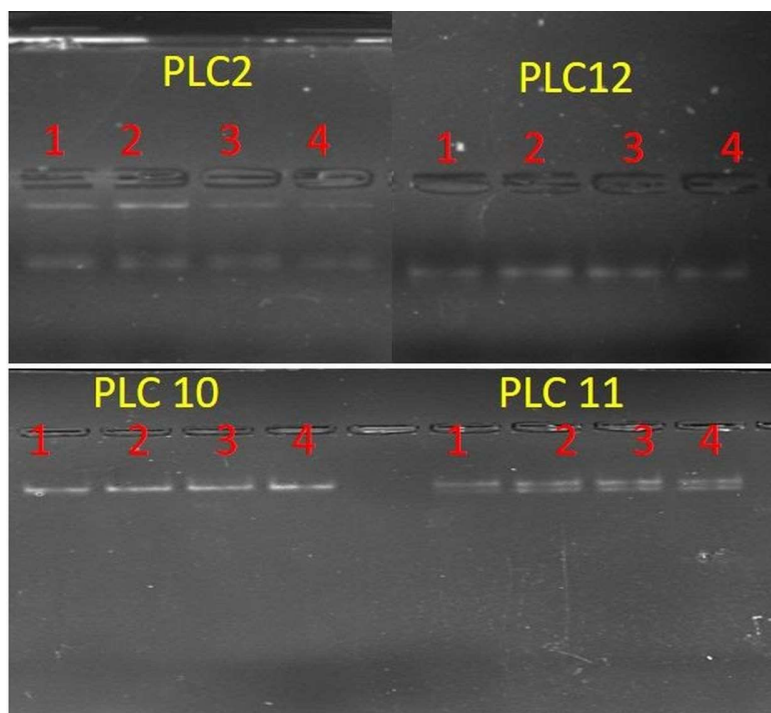

**Figure S1. A representative picture showing the amplification details in four lentil samples (Differing for the seed coat color) using SSR markers.** Where, PLC2, 12, 10, and 11 are the primers and 1: L4717, 2: brown seed-coated, 3: Black seed-coated, 4: Spotted seed-coated (2-4 are obtained from L4717-NM genotype expressing mixed phenotype).
